# Supplementary material
Source: Springer Nature journal article supplement (https://www.springermedizin.de/resource/supplementary/12943_2009_532_MOESM7_ESM.pdf/9554576)

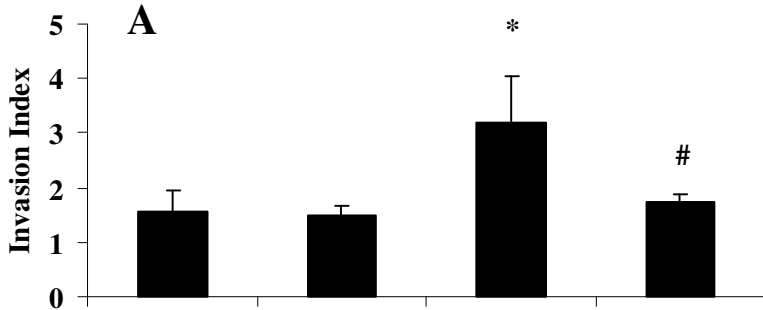

**Normoxia**

**Normoxia-  
AMD3100**

**Hypoxia**

**Hypoxia-  
AMD3100**

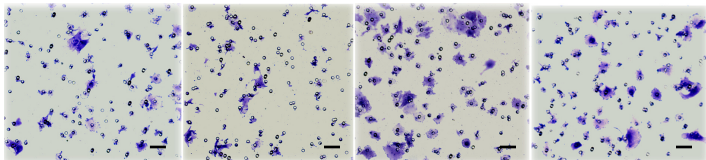

O<sub>2</sub> (%)

21

21

2

2

SDF-1

+

+

+

+

Supplement: MOESM7 [file 9554576]
